# Supplementary material for: C-MYC inducible onco-lncRNA LINC00036 acting as EGFR mRNA stabilizer via RNA-protein and RNA-RNA interactions decreases the sensitivity of gefitinib in human cancer
Source: Research Square preprint supplement (doi:10.21203/rs.3.rs-240846/v1), 2021-02-25
Supplement: Supplementary file 1 [file 43b4bb193c6b62e9ee5e007a.docx]

Table S6. Predict microRNAs binding to the 3’-UTR of EGFR using public databases TargetScan and RNA22.

| **TargetScan** | | | | | | | | | | | |
| --- | --- | --- | --- | --- | --- | --- | --- | --- | --- | --- | --- |
| miR-133a-3p.2 | | miR-411-5p.2 | | miR-372-3p | | | miR-106a-5p | | | | miR-2909 |
| miR-133b | | miR-455-3p.2 | | miR-520b | | | miR-519d-3p | | | | miR-1296-5p |
| miR-875-5p | | miR-137 | | miR-520c-3p | | | miR-526b-3p | | | | miR-1290 |
| miR-7-5p | | miR-302b-3p | | miR-520e | | | miR-493-5p | | | | miR-3167 |
| miR-138-5p | | miR-302e | | miR-373-3p | | | miR-144-3p | | | | miR-876-5p |
| miR-222-3p | | miR-302a-3p | | miR-106b-5p | | | miR-421 | | | | miR-378j |
| miR-221-3p | | miR-302d-3p | | miR-20a-5p | | | miR-4437 | | | | miR-6839-5p |
| miR-152-3p | | miR-302c-3p.1 | | miR-93-5p | | | miR-5088-5p | | | | miR-5706 |
| miR-148b-3p | | miR-520d-3p | | miR-20b-5p | | | miR-3158-3p | | | | miR-4782-5p |
| miR-148a-3p | | miR-520a-3p | | miR-17-5p | | | miR-4446-3p | | | | miR-5007-5p |
| miR-503-3p | | miR-370-3p | | miR-6740-5p | | | miR-7974 | | | | miR-6748-5p |
| miR-6861-5p | | miR-492 | | miR-6728-5p | | | miR-889-5p | | | | miR-134-3p |
| miR-6742-3p | | miR-4751 | | miR-5187-5p | | | miR-3622b-5p | | | | miR-7114-5p |
| miR-6852-5p | | miR-7154-3p | | miR-6513-5p | | | miR-4253 | | | | miR-622 |
| miR-939-3p | | miR-766-5p | | miR-769-3p | | | miR-6862-5p | | | | miR-548ap-3p |
| miR-1343-3p | | miR-6894-5p | | miR-450b-3p | | | miR-4767 | | | | miR-548t-3p |
| miR-6783-3p | | -miR-765 | | miR-5089-5p | | | miR-610 | | | | miR-548aa |
| miR-133a-3p.1 | | miR-4802-5p | | miR-4425 | | | miR-193a-5p | | | | miR-548aw |
| miR-4474-3p | | miR-4534 | | miR-3147 | | | miR-6759-5p | | | | miR-548f-5p |
| miR-6893-3p | | miR-8082 | | miR-4687-3p | | | miR-6793-5p | | | | miR-548g-5p |
| miR-548x-5p | | miR-16-2-3p | | miR-548ao-5p | | | miR-101-3p.2 | | | | miR-1343-5p |
| miR-548aj-5p | | miR-338-5p | | miR-548ax | | | miR-4659b-5p | | | | miR-3150a-3p |
| miR-1468-3p | | miR-7845-5p | | miR-3616-5p | | | miR-4659a-5p | | | | miR-3175 |
| miR-527 | | miR-4475 | | miR-573 | | | miR-4769-3p | | | | miR-939-5p |
| miR-518a-5p | | miR-7158-5p | | miR-6077 | | | miR-6817-5p | | | | miR-6825-5p |
| miR-4684-3p | | miR-767-3p | | miR-6079 | | | miR-6727-3p | | | | miR-1296-3p |
| miR-30b-5p | | miR-6828-3p | | miR-502-5p | | | miR-4722-3p | | | | miR-194-3p |
| hsa-miR-30c-5p | | miR-6071 | | miR-6875-3p | | | miR-1183 | | | | miR-5693 |
| miR-30a-5p | | miR-544a | | miR-4778-3p | | | miR-759 | | | | miR-5094 |
| hsa-miR-30e-5p | | miR-6738-3p | | miR-103a-2-5p | | | miR-4797-5p | | | | miR-6884-3p |
| miR-30d-5p | | miR-3606-3p | | miR-634 | | | miR-7515 | | | | miR-7152-3p |
| miR-8086 | | miR-513c-3p | | miR-451b | | | miR-3202 | | | | miR-497-3p |
| miR-6069 | | miR-513a-3p | | miR-6755-5p | | | miR-6876-5p | | | | miR-4261 |
| miR-4794 | | miR-577 | | miR-6823-5p | | | miR-4476 | | | | miR-6847-3p |
| miR-664a-5p | | miR-488-3p | | miR-4518 | | | miR-6840-3p | | | | miR-574-3p |
| miR-221-5p | | miR-510-3p | | miR-1266-5p | | | miR-6844 | | | | miR-6882-5p |
| miR-8073 | | miR-6800-3p | | miR-510-5p | | | miR-4659a-3p | | | | miR-206 |
| miR-5585-5p | | miR-3144-3p | | miR-4680-5p | | | miR-4659b-3p | | | | miR-1-3p |
| miR-3190-3p | | miR-3671 | | miR-6744-5p | | | miR-1468-5p | | | | miR-613 |
| miR-6134 | | miR-607 | | miR-1255b-5p | | | miR-1470 | | | | miR-548o-3p |
| miR-455-5p | | miR-1305 | | miR-1255a | | | miR-6887-3p | | | | miR-1323 |
| miR-4698 | | miR-335-3p | | miR-3116 | | | miR-6795-3p | | | | miR-4682 |
| miR-186-3p | | miR-5003-3p | | miR-1254 | | | miR-6826-3p | | | | miR-103a-3p |
| miR-891b | | 4668-3p | | miR-2861 | | | miR-6729-3p | | | | miR-107 |
| miR-4709-3p | | miR-548c-3p | | miR-6724-5p | | | miR-651-3p | | | | miR-486-3p |
| miR-27b-3p | | miR-95-5p | | miR-6773-5p | | | miR-4521 | | | | miR-4688 |
| miR-27a-3p | | miR-6793-3p | | miR-4259 | | | miR-1264 | | | | miR-6743-5p |
| miR-3681-3p | | miR-5695 | | miR-1178-3p | | | miR-3184-3p | | | | miR-4524b-3p |
| miR-128-3p | | miR-3145-5p | | miR-6841-3p | | | miR-548aq-5p | | | | miR-4696 |
| miR-216a-3p | | miR-548ah-3p | | miR-1915-5p | | | miR-559 | | | | miR-3120-3p |
| miR-513a-5p | | miR-548aj-3p | | hsa-miR-4448 | | | miR-548as-5p | | | | miR-2277-3p |
| miR-3977 | | miR-548aq-3p | | miR-6772-3p | | | miR-548h-5p | | | | miR-433-3p |
| miR-3607-3p | | miR-548ae-3p | | miR-4268 | | | miR-548j-5p | | | | miR-7154-5p |
| miR-3686 | | miR-548am-3p | | miR-218-5p | | | miR-548ap-5p | | | | miR-29a-5p |
| miR-4743-3p | | miR-548x-3p | | miR-7108-5p | | | miR-548ak | | | | miR-8075 |
| miR-4652-3p | | miR-548j-3p | | miR-8087 | | | miR-548o-5p | | | | miR-628-5p |
| miR-6854-3p | | miR-1273c | | miR-875-3p | | | miR-548d-5p | | | | miR-4723-3p |
| miR-1287-5p | | miR-4670-5p | | miR-1299 | | | miR-548ay-5p | | | | miR-6769b-3p |
| miR-3135b | | miR-6826-5p | | miR-6128 | | | miR-548w | | | | miR-3183 |
| miR-195-3p | | miR-551b-5p | | miR-518c-5p | | | miR-548c-5p | | | | miR-7111-3p |
| miR-3674 | miR-331-5p | | | miR-6780a-3p | | | | miR-548b-5p | | miR-4793-5p | |
| miR-1250-3p | miR-6509-5p | | | miR-5196-3p | | | | miR-548ad-5p | | miR-592 | |
| miR-5696 | miR-362-5p | | | miR-7843-3p | | | | miR-548au-5p | | miR-597-5p | |
| miR-664b-3p | miR-500b-5p | | | miR-127-5p | | | | miR-548bb-5p | | miR-4795-3p | |
| miR-579-3p | miR-501-5p | | | miR-4635 | | | | miR-548am-5p | | miR-126-5p | |
| miR-646 | miR-1250-5p | | | miR-671-5p | | | | miR-548ae-5p | | miR-3652 | |
| miR-2278 | miR-4746-3p | | | miR-6828-5p | | | | miR-548y | | miR-4430 | |
| miR-6501-3p | miR-4737 | | | miR-6499-3p | | | | miR-548i | | miR-4492 | |
| miR-3942-3p | miR-450a-5p | | | miR-6516-5p | | | | miR-548a-5p | | miR-5001-5p | |
| miR-205-3p | miR-129-5p | | | miR-557 | | | | miR-548ar-5p | | miR-4498 | |
| miR-4428 | miR-6888-5p | | | miR-507 | | | | miR-548ab | | miR-762 | |
| miR-4509 | miR-4266 | | | miR-3680-3p | | | | miR-548n | | miR-1587 | |
| miR-6812-5p | miR-372-5p | | | miR-450b-5p | | | | miR-520d-5p | | miR-4656 | |
| miR-6819-5p | miR-2114-3p | | | hsa-miR-19a-5p | | | | miR-524-5p | | miR-4741 | |
| miR-6737-5p | miR-6823-3p | | | miR-19b-2-5p | | | | miR-2681-5p | | miR-3620-5p | |
| miR-6747-5p | miR-1199-5p | | | miR-19b-1-5p | | | | miR-153-5p | | miR-4675 | |
| miR-342-5p | miR-6751-3p | | | miR-2052 | | | | miR-450a-2-3p | | miR-6829-5p | |
| miR-4664-5p | miR-4303 | | | miR-4255 | | | | miR-6810-5p | | miR-4417 | |
| miR-608 | miR-3200-5p | | | miR-142-3p.2 | | | | miR-4652-5p | | miR-4322 | |
| miR-4651 | miR-452-3p | | | miR-3591-5p | | | | miR-3191-3p | | miR-4296 | |
| miR-3170 | miR-586 | | | miR-432-5p | | | | miR-3144-5p | | miR-4265 | |
| miR-6855-5p | miR-6816-3p | | | miR-1248 | | | | miR-491-5p | | miR-299-3p | |
| miR-5572 | miR-5699-5p | | | miR-1245b-5p | | | | miR-126-3p.2 | | miR-4502 | |
| miR-92a-1-5p | miR-3189-5p | | | miR-3142 | | | | miR-6763-5p | | miR-4728-3p | |
| miR-7109-5p | miR-4758-3p | | | miR-4493 | | | | miR-4260 | | miR-7853-5p | |
| miR-328-5p | miR-3192-3p | | | miR-6126 | | | | miR-4775 | | miR-105-5p | |
| miR-6885-5p | miR-3151-3p | | | miR-605-3p | | | | miR-590-3p | | miR-664b-5p | |
| miR-6795-5p | miR-4762-3p | | | miR-8060 | | | | miR-4735-5p | | miR-1207-3p | |
| miR-6887-5p | miR-3182 | | | miR-6508-3p | | | | miR-3129-3p | | miR-6787-3p | |
| miR-6751-5p | miR-6740-3p | | | miR-6762-5p | | | | miR-5583-5p | | miR-3692-3p | |
| miR-6803-5p | miR-6750-5p | | | miR-6845-5p | | | | miR-587 | | miR-4678 | |
| miR-4665-5p | miR-6822-5p | | | miR-128-1-5p | | | | miR-141-5p | | miR-656-5p | |
| miR-1275 | miR-6797-5p | | | miR-1227-5p | | | | miR-4795-5p | | miR-504-5p.1 | |
| miR-631 | miR-1249-5p | | | miR-128-2-5p | | | | miR-3140-3p | | miR-6732-3p | |
| miR-4697-5p | miR-6515-5p | | | miR-4731-5p | | | | miR-208a-5p | | miR-3667-5p | |
| miR-1237-5p | miR-4254 | | | miR-5589-5p | | | | miR-208b-5p | | let-7c-3p | |
| miR-4488 | miR-619-3p | | | miR-3692-5p | | | | miR-6869-5p | | let-7g-3p | |
| miR-6848-5p | miR-3661 | | | miR-1234-3p | | | | miR-8081 | | let-7a-2-3p | |
| miR-6846-5p | miR-4803 | | | miR-7107-5p | | | | miR-4477a | | miR-643 | |
| miR-193b-5p | miR-4724-5p | | | miR-6850-3p | | | | miR-6885-3p | | miR-7114-3p | |
| miR-6732-5p | miR-6855-3p | | | miR-101-3p.1 | | | | miR-6878-5p | | miR-1180-5p | |
| miR-4779 | miR-4513 | | | miR-7847-3p | | | | miR-3185 | | miR-150-3p | |
| miR-6891-5p | miR-3136-5p | | | miR-4519 | | | | miR-4517 | | miR-4774-5p | |
| miR-3173-3p | miR-6857-3p | | | miR-4274 | | | | miR-6124 | | miR-4490 | |
| miR-4504 | miR-4439 | | | miR-4524b-5p | | | | miR-8071 | | miR-6824-3p | |
| miR-542-3p | miR-134-5p | | | miR-374b-3p | | | | miR-6880-5p | | miR-6764-3p | |
| miR-6818-5p | miR-3118 | | | miR-4524a-5p | | | | miR-584-5p | | miR-4714-5p | |
| miR-147a | miR-6820-3p | | | miR-5009-5p | | | | miR-4766-3p | | miR-514a-5p | |
| miR-5010-3p | miR-3164 | | | miR-8058 | | | | miR-32-3p | | miR-3664-5p | |
| miR-2113 | miR-6867-5p | | | miR-3138 | | | | miR-633 | | miR-6849-3p | |
| miR-1910-3p | miR-511-3p | | | miR-4800-5p | | | | miR-4282 | | miR-4482-5p | |
| miR-6511a-5p | miR-297 | | | miR-4491 | | | | miR-302a-5p | | miR-1295b-5p | |
| miR-3714 | miR-567 | | | miR-4657 | | | | miR-4747-5p | | miR-3130-5p | |
| miR-3922-5p | miR-3149 | | | miR-6790-3p | | | | miR-5196-5p | | miR-1912 | |
| miR-5585-3p | miR-675-3p | | | miR-6821-3p | | | | miR-3122 | | miR-3162-3p | |
| miR-1273e | miR-450a-1-3p | | | miR-657 | | | | miR-887-5p | | miR-4684-5p | |
| miR-636 | miR-548p | | | miR-6081 | | | | miR-3913-5p | | miR-3675-3p | |
| miR-520f-3p | miR-548e-5p | | | miR-6133 | | | | miR-146b-5p | | miR-216b-5p | |
| miR-302c-3p.2 | miR-3613-3p | | | miR-6130 | | | | miR-146a-5p | | miR-6716-5p | |
| miR-519a-3p | miR-3192-5p | | | miR-6129 | | | | miR-7153-5p | | miR-4717-3p | |
| miR-519b-3p | miR-6506-5p | | | miR-4510 | | | | miR-589-5p | | miR-5589-3p | |
| miR-519c-3p | miR-204-3p | | | miR-4419a | | | | miR-1245b-3p | | miR-1273g-3p | |
| miR-1537-5p | miR-619-5p | | | miR-6127 | | | | miR-5683 | | miR-6509-3p | |
| miR-4435 | miR-4646-5p | | | miR-6873-5p | | | | miR-4520-3p | | miR-181a-2-3p | |
| miR-663b | miR-4314 | | | miR-6866-5p | | | | miR-4638-3p | | miR-6833-3p | |
| miR-146b-3p | miR-1298-3p | | | miR-877-5p | | | | miR-3690 | | miR-4768-5p | |
| miR-874-3p | miR-345-5p | | | miR-331-3p | | | | miR-4308 | | miR-6873-3p | |
| miR-7976 | miR-301b-5p | | | miR-6810-3p | | | | miR-6836-3p | | miR-2117 | |
| miR-3173-5p | miR-301a-5p | | | miR-6801-3p | | | | miR-6791-3p | | miR-4273 | |
| miR-6799-3p | miR-760 | | | miR-6870-3p | | | | miR-6829-3p | | miR-7156-5p | |
| miR-365b-3p | miR-4283 | | | miR-4654 | | | | miR-550b-2-5p | | miR-4677-5p | |
| miR-365a-3p | miR-6813-5p | | | miR-4769-5p | | | | miR-1324 | | miR-6739-3p | |
| miR-3662 | miR-6085 | | | miR-4648 | | | | miR-6815-3p | | miR-4445-5p | |
| miR-6804-3p | miR-6789-5p | | | miR-1233-5p | | | | miR-1251-3p | | miR-509-5p | |
| miR-1298-5p | miR-135b-3p | | | miR-6778-5p | | | | miR-3975 | | miR-509-3-5p | |
| miR-616-3p | miR-4718 | | | miR-6796-5p | | | | miR-4641 | | miR-4418 | |
| miR-215-3p | miR-4999-5p | | | miR-8059 | | | | miR-378a-5p | | miR-5002-3p | |
| miR-5089-3p | miR-4524a-3p | | | miR-4471 | | | | miR-3653-5p | | miR-5190 | |
| miR-155-5p | miR-3672 | | | miR-5584-5p | | | | miR-1976 | | miR-4276 | |
| miR-4452 | miR-6864-3p | | | miR-9500 | | | | miR-6845-3p | | miR-374a-3p | |
| miR-4680-3p | miR-4461 | | | miR-3162-5p | | | | miR-6736-3p | | miR-361-5p | |
| miR-3140-5p | miR-3646 | | | miR-185-3p | | | | miR-4660 | | miR-3155b | |
| miR-4699-3p | miR-5093 | | | miR-637 | | | | miR-6721-5p | | miR-3155a | |
| miR-1279 | miR-5586-3p | | | miR-4292 | | | | miR-365b-5p | | miR-484 | |
| miR-5007-3p | miR-6782-5p | | | miR-6791-5p | | | | miR-365a-5p | | miR-3664-3p | |
| miR-652-5p | miR-4278 | | | miR-605-5p | | | | miR-8052 | | miR-3691-3p | |
| miR-6715a-3p | miR-6824-5p | | | miR-8063 | | | | miR-3199 | | miR-6807-5p | |
| miR-6715b-3p | miR-1911-3p | | | miR-373-5p | | | | miR-5694 | | miR-1252-3p | |
| miR-4422 | miR-6753-5p | | | miR-371b-5p | | | | miR-2681-3p | | miR-887-3p | |
| miR-3611 | miR-660-5p | | | miR-616-5p | | | | miR-6800-5p | | miR-3605-5p | |
| miR-409-3p | miR-5591-3p | | | miR-6854-5p | | | | miR-6802-5p | | miR-1185-5p | |
| miR-4772-3p | miR-485-3p | | | miR-7705 | | | | miR-1258 | | miR-3679-5p | |
| miR-2276-3p | miR-539-3p | | | miR-3682-3p | | | | miR-3127-5p | | miR-4710 | |
| miR-4799-5p | miR-4307 | | | miR-6088 | | | | miR-3918 | | miR-4792 | |
| miR-6868-3p | miR-211-3p | | | miR-4770 | | | | miR-4772-5p | | miR-7855-5p | |
| miR-1237-3p | miR-6754-5p | | | miR-143-3p | | | | miR-383-5p.1 | | miR-4299 | |
| miR-1252-5p | miR-4441 | | | miR-4756-3p | | | | miR-1278 | | miR-133a-5p | |
| miR-4533 | miR-4270 | | | miR-3678-3p | | | | miR-1911-5p | | miR-6131 | |
| miR-651-5p | miR-1257 | | | miR-2467-3p | | | | miR-1289 | | miR-203b-3p | |
| miR-944 | miR-4639-5p | | | miR-3944-5p | | | | miR-4309 | | miR-4267 | |
| miR-539-5p | miR-3121-5p | | | miR-143-5p | | | | miR-3198 | | miR-6512-3p | |
| miR-3925-5p | miR-7856-5p | | | miR-1304-3p | | | | miR-4294 | | miR-6720-5p | |
| miR-3123 | miR-4477b | | | miR-1229-3p | | | | miR-6514-5p | | miR-3180-5p | |
| miR-6832-5p | miR-1256 | | | miR-942-5p | | | | miR-6757-5p | | miR-6835-5p | |
| miR-4732-5p | miR-4720-5p | | | miR-203a-3p.1 | | | | miR-873-5p.1 | | miR-4447 | |
| miR-5187-3p | miR-5588-5p | | | miR-5680 | | | | miR-4705 | | miR-4472 | |
| miR-4661-5p | miR-4799-3p | | | miR-10b-3p | | | | miR-4755-3p | | miR-92a-2-5p | |
| miR-708-3p | miR-6868-5p | | | miR-4330 | | | | miR-4753-5p | | miR-125a-3p | |
| miR-4674 | miR-3128 | | | miR-216a-5p | | | | miR-506-3p | | miR-764 | |
| miR-654-5p | miR-1231 | | | miR-3163 | | | | miR-124-3p.2 | | miR-3934-5p | |
| miR-541-3p | miR-3120-5p | | | miR-888-3p | | | | miR-6841-5p | | miR-3934-3p | |
| miR-3148 | miR-5699-3p | | | miR-140-5p | | | | miR-3137 | | miR-330-3p | |
| miR-4496 | miR-4421 | | | miR-4796-3p | | | | miR-20b-3p | | miR-6837-5p | |
| miR-8485 | miR-6748-3p | | | miR-7854-3p | | | | miR-3160-5p | | miR-4685-5p | |
| miR-7151-3p | miR-3064-5p | | | miR-7162-3p | | | | miR-4438 | | miR-1915-3p | |
| miR-5095 | miR-6504-5p | | | miR-544b | | | | miR-3928-3p | | miR-6764-5p | |
| miR-1288-3p | miR-661 | | | miR-4324 | | | | miR-3915 | | miR-4726-3p | |
| miR-3169 | miR-550a-5p | | | miR-1200 | | | | miR-665 | | miR-374c-3p | |
| miR-452-5p | miR-550a-3-5p | | | miR-4666b | | | | miR-3974 | | miR-7159-3p | |
| miR-4676-3p | miR-1271-3p | | | miR-20a-3p | | | | miR-555 | | miR-4482-3p | |
| miR-892c-3p | miR-515-3p | | | miR-4256 | | | | miR-6881-5p | | miR-29b-2-5p | |
| miR-1208 | miR-33b-3p | | | miR-6874-3p | | | | miR-7704 | | miR-4463 | |
| miR-141-3p | miR-519e-3p | | | miR-148b-5p | | | | miR-615-5p | | miR-873-3p | |
| miR-200a-3p | miR-342-3p | | | miR-4277 | | | | miR-7155-5p | | miR-4719 | |
| miR-5192 | miR-6737-3p | | | miR-7977 | | | | miR-320e | | miR-6838-5p | |
| miR-4791 | miR-7157-3p | | | miR-922 | | | | miR-3928-5p | | miR-503-5p | |
| miR-3201 | miR-5008-3p | | | miR-4789-3p | | | | miR-6806-3p | | miR-424-5p | |
| miR-376b-5p | miR-6889-3p | | | miR-642b-3p | | | | miR-3124-3p | | miR-497-5p | |
| miR-376c-5p | miR-6805-3p | | | miR-642a-3p | | | | miR-3670 | | miR-15b-5p | |
| miR-3165 | miR-5691 | | | miR-514a-3p | | | | miR-6770-3p | | miR-16-5p | |
| miR-6745 | miR-3194-3p | | | miR-514b-3p | | | | miR-4467 | | miR-195-5p | |
| miR-363-5p | miR-6752-3p | | | miR-526b-5p | | | | miR-1322 | | miR-15a-5p | |
| miR-6890-5p | miR-7113-3p | | | miR-4686 | | | | miR-1303 | | miR-6505-5p | |
| miR-432-3p | miR-711 | | | miR-6072 | | | | miR-3139 | | miR-24-2-5p | |
| miR-3161 | miR-1286 | | | miR-6891-3p | | | | miR-28-5p | | miR-24-1-5p | |
| miR-599 | miR-6893-5p | | | miR-6747-3p | | | | miR-708-5p | | miR-4774-3p | |
| miR-4539 | miR-6808-5p | | | miR-3680-5p | | | | miR-6859-5p | | miR-4423-5p | |
| miR-4419b | miR-940 | | | miR-4501 | | | | miR-3125 | | miR-744-3p | |
| miR-3929 | miR-4692 | | | miR-8066 | | | | miR-3916 | | miR-6501-5p | |
| miR-4478 | miR-4514 | | | miR-187-5p | | | | miR-3921 | | miR-552-3p | |
| miR-6806-5p | miR-4269 | | | miR-548v | | | | miR-4653-5p | | miR-4709-5p | |
| miR-298 | miR-6715b-5p | | | miR-28-3p | | | | miR-146a-3p | | miR-505-3p.2 | |
| miR-645 | miR-4742-5p | | | miR-8084 | | | | miR-3191-5p | | miR-7159-5p | |
| miR-200c-5p | miR-4279 | | | miR-1283 | | | | miR-6866-3p | | miR-3616-3p | |
| miR-550a-3p | miR-5088-3p | | | miR-4693-5p | | | | miR-188-5p | | miR-1226-5p | |
| miR-576-3p | miR-4287 | | | miR-512-3p | | | | miR-4432 | | miR-4721 | |
| miR-4522 | miR-4685-3p | | | miR-4473 | | | | miR-5197-3p | | miR-6834-5p | |
| miR-3688-3p | miR-6778-3p | | | miR-6080 | | | | miR-3976 | | miR-411-5p.1 | |
| miR-490-5p | miR-6089 | | | miR-4469 | | | | miR-378d | | miR-513b-5p | |
| miR-205-5p | miR-5008-5p | | | miR-6867-3p | | | | miR-378i | | miR-4457 | |
| miR-4516 | miR-4316 | | | miR-4639-3p | | | | miR-378a-3p | | miR-595 | |
| miR-4531 | miR-1294 | | | miR-7702 | | | | miR-378h | | miR-548az-5p | |
| miR-4434 | miR-4677-3p | | | miR-6083 | | | | miR-422a | | miR-548t-5p | |
| miR-5703 | miR-1914-5p | | | miR-3978 | | | | miR-378b | | miR-4781-3p | |
| miR-620 | miR-660-3p | | | miR-4694-3p | | | | miR-378e | | miR-4528 | |
| miR-1270 | miR-5193 | | | miR-554 | | | | miR-378c | | miR-1288-5p | |
| miR-411-3p | miR-769-5p | | | miR-3923 | | | | miR-378f | | miR-4468 | |
| miR-2054 | miR-4786-5p | | | miR-556-3p | | | | miR-490-3p | | miR-6830-5p | |
| miR-888-5p | miR-4329 | | | miR-656-3p | | | | miR-7106-3p | | miR-6809-5p | |
| miR-550b-3p | miR-6825-3p | | | miR-6507-5p | | | | miR-140-3p.1 | | miR-6856-3p | |
| miR-606 | miR-1306-5p | | | miR-6792-5p | | | | miR-324-5p | | miR-329-5p | |
| miR-578 | miR-4325 | | | miR-513b-3p | | | | miR-1265 | | miR-26b-3p | |
| miR-6835-3p | miR-4793-3p | | | miR-196a-3p | | | | miR-2392 | | miR-541-5p | |
| miR-9-3p | miR-500a-3p | | | miR-6785-5p | | | | miR-4295 | | miR-583 | |
| miR-33a-3p | miR-502-3p | | | miR-6883-5p | | | | miR-130a-3p | | miR-6842-3p | |
| miR-7-1-3p | miR-501-3p | | | miR-4728-5p | | | | miR-301b-3p | | miR-644a | |
| miR-7-2-3p | miR-210-5p | | | miR-149-3p | | | | miR-301a-3p | | miR-3665 | |
| miR-495-3p | miR-4749-3p | | | miR-1321 | | | | miR-130b-3p | | miR-4736 | |
| miR-5688 | miR-1238-3p | | | miR-4756-5p | | | | miR-3666 | | miR-7150 | |
| miR-568 | miR-670-3p | | | miR-4739 | | | | miR-454-3p | | miR-183-5p.1 | |
| miR-758-3p | miR-885-3p | | | miR-6760-5p | | | | miR-504-3p | | miR-5195-5p | |
| miR-4733-5p | miR-6744-3p | | | miR-890 | | | | miR-122-5p | | miR-320b | |
| miR-376c-3p | miR-4757-5p | | | miR-548an | | | | miR-9-5p | | miR-320d | |
| miR-6894-3p | miR-650 | | | miR-4484 | | | | miR-100-3p | | miR-4429 | |
| miR-4763-5p | miR-3612 | | | miR-4668-5p | | | | miR-545-3p | | miR-320c | |
| miR-603 | miR-4443 | | | miR-6739-5p | | | | miR-4291 | | miR-320a | |
| miR-570-3p | miR-3689d | | | miR-3153 | | | | miR-4511 | | miR-676-5p | |
| miR-4802-3p | miR-6799-5p | | | miR-6733-5p | | | | miR-5003-5p | | miR-4711-3p | |
| miR-4671-3p | miR-6738-5p | | | miR-4318 | | | | miR-224-5p | | miR-3121-3p | |
| miR-196a-5p | miR-6734-5p | | | miR-6760-3p | | | | miR-4483 | | miR-548at-5p | |
| miR-196b-5p | miR-5194 | | | miR-653-3p | | | | miR-1293 | | miR-3065-5p | |
| miR-1197 | miR-1914-3p | | | miR-181b-2-3p | | | | miR-6722-3p | | miR-4311 | |
| miR-5004-5p | miR-423-5p | | | miR-181b-3p | | | | miR-1909-3p | | miR-5000-5p | |
| miR-1301-3p | miR-3184-5p | | | miR-4420 | | | | miR-4763-3p | | miR-1277-5p | |
| miR-5047 | miR-5001-3p | | | miR-1295b-3p | | | | miR-1207-5p | | miR-4263 | |
| miR-499b-5p | miR-4727-5p | | | miR-379-3p | | | | miR-1827 | | miR-576-5p | |
| miR-5100 | miR-627-3p | | | miR-628-3p | | | | miR-17-3p | | miR-8068 | |
| miR-892c-5p | miR-4645-5p | | | miR-1243 | | | | miR-3158-5p | | miR-892a | |
| miR-93-3p | miR-4673 | | | miR-4712-3p | | | | miR-1205 | | miR-548g-3p | |
| miR-4633-3p | miR-508-5p | | | miR-1272 | | | | miR-1184 | | miR-548av-3p | |
| miR-6500-5p | miR-4527 | | | miR-6757-3p | | | | miR-632 | | miR-8054 | |
| miR-6874-5p | miR-6503-5p | | | miR-4666a-5p | | | | miR-4288 | | miR-548av-5p | |
| miR-2355-5p | miR-7107-3p | | | miR-600 | | | | miR-346 | | miR-548k | |
| miR-3679-3p | miR-6753-3p | | | miR-31-3p | | | | miR-654-3p | | miR-548l | |
| miR-4446-5p | miR-6848-3p | | | miR-520g-3p | | | | miR-6756-3p | | miR-4744 | |
| miR-145-3p | miR-6843-3p | | | miR-520h | | | | miR-3127-3p | | miR-520f-5p | |
| miR-3159 | miR-219b-3p | | | miR-410-3p | | | | miR-5588-3p | | miR-7110-3p | |
| miR-3926 | miR-219a-2-3p | | | miR-5011-5p | | | | miR-2114-5p | | miR-6817-3p | |
| miR-548s | miR-183-3p | | | miR-190a-3p | | | | miR-3074-5p | | miR-6895-3p | |
| miR-508-3p | miR-4507 | | | miR-130a-5p | | | | miR-7152-5p | | miR-92b-3p | |
| miR-5186 | miR-3940-5p | | | miR-23b-3p | | | | miR-1825 | | miR-25-3p | |
| miR-4661-3p | miR-6839-3p | | | miR-23a-3p | | | | miR-580-3p | | miR-92a-3p | |
| miR-4762-5p | miR-4740-3p | | | miR-23c | | | | miR-4780 | | miR-32-5p | |
| miR-6879-3p | miR-3943 | | | miR-33a-5p | | | | miR-1249-3p | | miR-367-3p | |
| miR-2053 | miR-1225-3p | | | miR-33b-5p | | | | miR-4632-3p | | miR-363-3p | |
| miR-569 | miR-1276 | | | miR-448 | | | | miR-6746-3p | | miR-4328 | |
| miR-1267 | miR-15b-3p | | | miR-5700 | | | | miR-4632-5p | | miR-30e-3p | |
| miR-367-5p | miR-1224-3p | | | miR-8078 | | | | miR-7843-5p | | miR-30d-3p | |
| miR-626 | miR-5697 | | | miR-3925-3p | | | | miR-6879-5p | | miR-30a-3p | |
| miR-6876-3p | miR-4480 | | | miR-766-3p | | | | miR-4436b-3p | | miR-6832-3p | |
| miR-4670-3p | miR-1909-5p | | | miR-648 | | | | miR-6735-5p | | miR-3152-5p | |
| miR-424-3p | miR-361-3p | | | miR-7158-3p | | | | miR-6814-5p | | miR-6881-3p | |
| miR-340-5p | miR-874-5p | | | miR-499a-5p | | | | miR-4699-5p | | miR-877-3p | |
| miR-142-5p | miR-183-5p.2 | | | miR-296-5p | | | | miR-3649 | | miR-5681a | |
| miR-5590-3p | miR-891a-3p | | | miR-1251-5p | | | | miR-4298 | | miR-6086 | |
| miR-4761-5p | miR-4693-3p | | | miR-517-5p | | | | miR-1302 | | miR-377-5p | |
| miR-561-5p | miR-3174 | | | miR-4427 | | | | miR-29b-1-5p | | miR-655-5p | |
| miR-5582-3p | miR-921 | | | miR-7156-3p | | | | miR-6830-3p | | miR-590-5p | |
| miR-4317 | miR-6847-5p | | | miR-668-3p | | | | miR-449b-3p | | miR-5579-3p | |
| miR-429 | miR-125b-2-3p | | | miR-219b-5p | | | | miR-4251 | | miR-21-5p | |
| miR-200b-3p | miR-4731-3p | | | miR-498 | | | | miR-3622b-3p | | miR-192-5p | |
| miR-200c-3p | miR-4801 | | | miR-27a-5p | | | | miR-3622a-3p | | miR-215-5p | |
| miR-374c-5p | miR-155-3p | | | miR-4649-3p | | | | miR-3130-3p | | miR-197-3p | |
| miR-655-3p | miR-1226-3p | | | miR-423-3p | | | | miR-378g | | miR-412-3p | |
| miR-5692c | miR-500b-3p | | | miR-3610 | | | | miR-5787 | | miR-6754-3p | |
| miR-5692b | miR-8077 | | | miR-4323 | | | | miR-4505 | | miR-6837-3p | |
| miR-3133 | miR-4663 | | | miR-5685 | | | | miR-6768-3p | | miR-1236-3p | |
| miR-186-5p | miR-7160-5p | | | miR-4690-3p | | | | miR-4766-5p | | miR-6515-3p | |
| miR-512-5p | miR-6851-5p | | | miR-3157-5p | | | | miR-3907 | | miR-6809-3p | |
| miR-548ai | miR-522-5p | | | miR-629-5p | | | | miR-6842-5p | | miR-4753-3p | |
| miR-570-5p | miR-523-5p | | | miR-4768-3p | | | | miR-7110-5p | | miR-548ad-3p | |
| miR-548ag | miR-519a-5p | | | hsa-miR-4459 | | | | miR-6752-5p | | miR-548ac | |
| miR-548ba | miR-518e-5p | | | miR-4433a-3p | | | | miR-6798-5p | | miR-548z | |
| miR-323a-3p | miR-519b-5p | | | miR-513c-5p | | | | miR-106a-3p | | miR-548bb-3p | |
| miR-5704 | miR-518d-5p | | | miR-514b-5p | | | | miR-6508-5p | | miR-548d-3p | |
| miR-1295a | miR-518f-5p | | | miR-3168 | | | | miR-8067 | | miR-548h-3p | |
| miR-3667-3p | miR-526a | | | miR-5584-3p | | | | miR-519c-5p | | miR-5009-3p | |
| miR-6886-3p | miR-520c-5p | | | miR-3129-5p | | | | miR-129-1-3p | | miR-3685 | |
| miR-6851-3p | miR-4777-5p | | | miR-199b-3p | | | | miR-1233-3p | | miR-384 | |
| miR-4733-3p | miR-182-3p | | | miR-199a-3p | | | | miR-1244 | | miR-1913 | |
| miR-1260b | miR-4257 | | | miR-4716-5p | | | | miR-325 | | miR-324-3p | |
| miR-1260a | miR-4717-5p | | | miR-129-2-3p | | | | miR-15a-3p | | miR-6890-3p | |
| miR-885-5p |  | | |  | | | |  | |  | |
| **RAN22** | | | | | | | | | | | |
| let-7a-5p | | | miR-1180-3p | | miR-1226-5p | miR-1251-3p | | | miR-1270 | | |
| let-7b-5p | | | miR-1180-5p | | miR-1227-5p | miR-1254 | | | miR-1271-3p | | |
| let-7c-5p | | | miR-1182 | | miR-1228-5p | miR-1255a | | | miR-1271-5p | | |
| let-7d-5p | | | miR-1183 | | miR-1229-3p | miR-1255b-5p | | | miR-1272 | | |
| let-7e-5p | | | miR-1184 | | miR-1229-5p | miR-1257 | | | miR-1273a | | |
| let-7f-5p | | | miR-1193 | | miR-122-5p | miR-1258 | | | miR-1273d | | |
| let-7g-3p | | | miR-1199-3p | | miR-1231 | miR-125a-3p | | | miR-1273f | | |
| let-7g-5p | | | miR-1199-5p | | miR-1233-3p | miR-125a-5p | | | miR-1273g-3p | | |
| let-7i-3p | | | miR-1200 | | miR-1233-5p | miR-125b-1-3 | | | miR-1273g-5p | | |
| let-7i-5p | | | miR-1202 | | miR-1236-3p | miR-1261 | | | miR-1273h-3p | | |
| miR-103a-2-5 | | | miR-1203 | | miR-1236-5p | miR-1262 | | | miR-1273h-5p | | |
| miR-103a-3p | | | miR-1204 | | miR-1237-5p | miR-1263 | | | miR-1275 | | |
| miR-105-3p | | | miR-1205 | | miR-1238-3p | miR-1265 | | | miR-127-3p | | |
| miR-106a-5p | | | miR-1207-3p | | miR-1238-5p | miR-1266-3p | | | miR-127-5p | | |
| miR-106b-3p | | | miR-1207-5p | | miR-1245b-3p | miR-1266-5p | | | miR-1281 | | |
| miR-106b-5p | | | miR-1208 | | miR-1248 | miR-1268a | | | miR-1282 | | |
| miR-107E | | | miR-1224-5p | | miR-1249-5p | miR-1268b | | | miR-1285-3p | | |
| miR-10a-5p | | | miR-1225-3p | | miR-124-3p | miR-1269a | | | miR-1285-5p | | |
| miR-1178-3p | | | miR-1225-5p | | miR-124-5p | miR-1269b | | | miR-1286 | | |
| let-7a-2-3 | | | miR-1178-5p | | miR-1226-3p | miR-1250-5p | | | miR-1287-5p | | |
| miR-1343-3p | | | miR-183-5p | | miR-3149 | miR-449c-3p | | | miR-1288-3p | | |
| miR-1343-5p | | | miR-184E | | miR-3150a-3p | miR-449c-5p | | | miR-1289 | | |
| miR-134-3p | | | miR-185-3p | | miR-3150b-3p | miR-4500 | | | miR-128-1-5p | | |
| miR-134-5p | | | miR-185-5p | | miR-3151-3p | miR-4502 | | | miR-128-2-5p | | |
| miR-135a-3p | | | miR-187-3p | | miR-3151-5p | miR-4505 | | | miR-128-3p | | |
| miR-135b-3p | | | miR-188-3p | | miR-3152-3p | miR-4506 | | | miR-1290 | | |
| miR-136-3p | | | miR-188-5p | | miR-3154 | miR-4507 | | | miR-1291 | | |
| miR-136-5p | | | miR-18a-3p | | miR-3157-3p | miR-4508 | | | miR-1292-3p | | |
| miR-138-1-3p | | | miR-18a-5p | | miR-3158-3p | miR-450b-3p | | | miR-1292-5p | | |
| miR-139-3p | | | miR-18b-5p | | miR-3158-5p | miR-4510 | | | miR-1293 | | |
| miR-140-3p | | | miR-1908-3p | | miR-3160-5p | miR-4514 | | | miR-1294 | | |
| miR-140-5p | | | miR-1908-5p | | miR-3165 | miR-4515 | | | miR-1296-3p | | |
| miR-141-5p | | | miR-1909-3p | | miR-3166 | miR-4518 | | | miR-1296-5p | | |
| miR-142-3p | | | miR-1909-5p | | miR-3167 | miR-4519 | | | miR-1299 | | |
| miR-143-5p | | | miR-1910-3p | | miR-3168 | miR-4520-3p | | | miR-129-5p | | |
| miR-145-3p | | | miR-1910-5p | | miR-3169 | miR-4520-5p | | | miR-1301-3p | | |
| miR-145-5p | | | miR-1911-3p | | miR-3170 | miR-4521 | | | miR-1302 | | |
| miR-1468-5p | | | miR-1913 | | miR-3171 | miR-4524a-3p | | | miR-1303 | | |
| miR-1469 | | | miR-1914-3p | | miR-3173-5p | miR-4524b-3p | | | miR-1304-3p | | |
| miR-146a-3p | | | miR-1914-5p | | miR-3174 | miR-4525 | | | miR-1304-5p | | |
| miR-146b-3p | | | miR-1915-3p | | miR-3175 | miR-4529-3p | | | miR-1306-3p | | |
| miR-1470 | | | miR-1915-5p | | miR-3176 | miR-4530 | | | miR-1307-3p | | |
| miR-1471 | | | miR-191-3p | | miR-3177-3p | miR-4532 | | | miR-1307-5p | | |
| miR-147a | | | miR-193a-5p | | miR-3177-5p | miR-4534 | | | miR-130a-5p | | |
| miR-147b | | | miR-193b-5p | | miR-3178 | miR-4535 | | | miR-130b-3p | | |
| miR-148b-5p | | | miR-194-3p | | miR-3179 | miR-4536-5p | | | miR-1321 | | |
| miR-149-3p | | | miR-195-5p | | miR-3180-3p | miR-4537 | | | miR-1322 | | |
| miR-149-5p | | | miR-196a-5p | | miR-3180-5p | miR-4538 | | | miR-133a-3p | | |
| miR-150-3p | | | miR-196b-3p | | miR-3180 | miR-455-3p | | | miR-133b | | |
| miR-151a-3p | | | miR-196b-5p | | miR-3181 | miR-455-5p | | | miR-126-5p | | |
| miR-152-3p | | | miR-1972 | | miR-3182 | miR-4632-3p | | | miR-4651 | | |
| miR-152-5p | | | miR-1973 | | miR-3183 | miR-4632-5p | | | miR-4652-3p | | |
| miR-1537-5p | | | miR-1976 | | miR-3184-5p | miR-4633-3p | | | miR-4653-3p | | |
| miR-1538 | | | miR-197-5p | | miR-3186-3p | miR-4634 | | | miR-4653-5p | | |
| miR-1539 | | | miR-198 E | | miR-3186-5p | miR-4635 | | | miR-4654 | | |
| miR-153-3p | | | miR-199a-3p | | miR-3187-3p | miR-4638-3p | | | miR-4655-3p | | |
| miR-155-3p | | | miR-199b-3p | | miR-3187-5p | miR-4638-5p | | | miR-4655-5p | | |
| miR-155-5p | | | miR-19a-5p | | miR-3188 | miR-4640-5p | | | miR-4656 | | |
| miR-1587 | | | miR-19b-1-5p | | miR-3189-3p | miR-4641 | | | miR-4657 | | |
| miR-15a-3p | | | miR-19b-2-5p | | miR-3189-5p | miR-4642 | | | miR-4658 | | |
| miR-15a-5p | | | miR-19b-3p | | miR-3190-3p | miR-4646-3p | | | miR-4659a-3p | | |
| miR-16-1-3p | | | miR-1-5p | | miR-3190-5p | miR-4646-5p | | | miR-4659b-3p | | |
| miR-16-5p | | | miR-200b-5p | | miR-3191-3p | miR-4647 | | | miR-4660 | | |
| miR-17-5p | | | miR-200c-5p | | miR-3191-5p | miR-4648 | | | miR-4661-3p | | |
| miR-181a-2-3 | | | miR-202-3p | | miR-3192-3p | miR-4649-3p | | | miR-4664-5p | | |
| miR-181d-3p | | | miR-202-5p | | miR-3192-5p | miR-4649-5p | | | miR-4665-5p | | |
| miR-1827 | | | miR-203a-3p | | miR-3193 | miR-6500-5p | | | miR-4666b | | |
| miR-182-3p | | | miR-204-3p | | miR-3194-3p | miR-6501-3p | | | miR-4667-3p | | |
| miR-182-5p | | | miR-204-5p | | miR-3194-5p | miR-6501-5p | | | miR-4667-5p | | |
| miR-183-3p | | | miR-205-3p | | miR-3195 | miR-6503-5p | | | miR-4669 | | |
| miR-558 E | | | miR-205-5p | | miR-3196 | miR-6504-5p | | | miR-4670-5p | | |
| miR-5591-5p | | | miR-20a-5p | | miR-3197 | miR-6505-3p | | | miR-4671-5p | | |
| miR-563 E | | | miR-20b-3p | | miR-3198 | miR-6506-5p | | | miR-4672 | | |
| miR-564 E | | | miR-210-3p | | miR-3199 | miR-6508-5p | | | miR-4674 | | |
| miR-566 E | | | miR-210-5p | | miR-31-3p | miR-650 E | | | miR-4675 | | |
| miR-567 E | | | miR-2110 | | miR-31-5p | miR-6510-3p | | | miR-4676-3p | | |
| miR-5691 | | | miR-2113 | | miR-3200-3p | miR-6510-5p | | | miR-4676-5p | | |
| miR-5698 | | | miR-2114-3p | | miR-3202 | miR-6511a-5p | | | miR-4677-3p | | |
| miR-5699-3p | | | miR-2116-5p | | miR-320a | miR-6513-5p | | | miR-4677-5p | | |
| miR-5699-5p | | | miR-2117 | | miR-320b | miR-6515-3p | | | miR-4678 | | |
| miR-5702 | | | miR-212-5p | | miR-323a-5p | miR-6515-5p | | | miR-4682 | | |
| miR-5703 | | | miR-214-5p | | miR-323b-5p | miR-6516-3p | | | miR-4683 | | |
| miR-5705 | | | miR-218-1-3p | | miR-324-3p | miR-653-3p | | | miR-4684-3p | | |
| miR-5706 | | | miR-218-2-3p | | miR-324-5p | miR-654-5p | | | miR-4684-5p | | |
| miR-5707 | | | miR-219a-1-3 | | miR-325E | miR-656-5p | | | miR-4685-3p | | |
| miR-570-3p | | | miR-219b-5p | | miR-328-5p | miR-657 E | | | miR-4685-5p | | |
| miR-570-5p | | | miR-221-3p | | miR-329-5p | miR-658 E | | | miR-4686 | | |
| miR-572E | | | miR-221-5p | | miR-330-5p | miR-659-3p | | | miR-4687-3p | | |
| miR-5739 | | | miR-223-3p | | miR-331-5p | miR-659-5p | | | miR-4687-5p | | |
| miR-574-3p | | | miR-2277-3p | | miR-335-3p | miR-660-3p | | | miR-4688 | | |
| miR-574-5p | | | miR-2277-5p | | miR-338-3p | miR-661E | | | miR-4689 | | |
| miR-575 E | | | miR-2278 | | miR-339-3p | miR-662 E | | | miR-4690-5p | | |
| miR-5787 | | | miR-2355-3p | | miR-339-5p | miR-663a | | | miR-4691-5p | | |
| miR-578 E | | | miR-2392 | | miR-33a-5p | miR-663b | | | miR-4692 | | |
| miR-579-3p | | | miR-23a-5p | | miR-33b-3p | miR-664a-5p | | | miR-4695-5p | | |
| miR-579-5p | | | miR-23b-5p | | miR-33b-5p | miR-664b-3p | | | miR-4697-3p | | |
| miR-581 E | | | miR-2467-3p | | miR-340-3p | miR-664b-5p | | | miR-4697-5p | | |
| miR-582-5p | | | miR-2467-5p | | miR-342-5p | miR-668-3p | | | miR-4700-5p | | |
| miR-584-3p | | | miR-24-1-5p | | miR-345-5p | miR-668-5p | | | miR-4701-3p | | |
| miR-584-5p | | | miR-24-3p | | miR-346 E | miR-670-5p | | | miR-4701-5p | | |
| miR-585-3p | | | miR-25-5p | | miR-34a-5p | miR-6715a-3p | | | miR-4703-3p | | |
| miR-587 E | | | miR-2682-5p | | miR-34b-5p | miR-6715b-5p | | | miR-4705 | | |
| miR-588 E | | | miR-26a-5p | | miR-34c-5p | miR-6716-5p | | | miR-4706 | | |
| miR-592 E | | | miR-26b-3p | | miR-3529-5p | miR-6717-5p | | | miR-4707-5p | | |
| miR-593-3p | | | miR-27a-5p | | miR-3605-3p | miR-6718-5p | | | miR-4708-5p | | |
| miR-593-5p | | | miR-2861 | | miR-3605-5p | miR-671-3p | | | miR-4710 | | |
| miR-596 E | | | miR-28-3p | | miR-3607-5p | miR-671-5p | | | miR-4711-3p | | |
| miR-597-3p | | | miR-296-3p | | miR-3610 | miR-6720-3p | | | miR-4711-5p | | |
| miR-597-5p | | | miR-297 E | | miR-3612 | miR-6720-5p | | | miR-4712-5p | | |
| miR-598-5p | | | miR-298 E | | miR-3614-3p | miR-6721-5p | | | miR-4713-3p | | |
| miR-600E | | | miR-299-3p | | miR-3614-5p | miR-6722-3p | | | miR-4713-5p | | |
| miR-601E | | | miR-299-5p | | miR-3615 | miR-6722-5p | | | miR-4715-5p | | |
| miR-602 E | | | miR-29a-5p | | miR-3616-3p | miR-6723-5p | | | miR-4716-3p | | |
| miR-604 E | | | miR-29b-1-5p | | miR-3619-3p | miR-6724-5p | | | miR-4717-3p | | |
| miR-6068 | | | miR-29b-2-5p | | miR-3619-5p | miR-6726-3p | | | miR-4718 | | |
| miR-6069 | | | miR-29c-5p | | miR-361-3p | miR-6726-5p | | | miR-4721 | | |
| miR-6070 | | | miR-301b-5p | | miR-3620-3p | miR-6727-3p | | | miR-4722-5p | | |
| miR-6071 | | | miR-3064-5p | | miR-3620-5p | miR-6727-5p | | | miR-4723-3p | | |
| miR-6073 | | | miR-3074-5p | | miR-3621 | miR-6728-3p | | | miR-4723-5p | | |
| miR-6074 | | | miR-30b-3p | | miR-3622a-3p | miR-6728-5p | | | miR-4725-3p | | |
| miR-6075 | | | miR-30c-1-3p | | miR-3622a-5p | miR-6729-5p | | | miR-4726-3p | | |
| miR-6076 | | | miR-30c-2-3p | | miR-3622b-3p | miR-6730-5p | | | miR-4726-5p | | |
| miR-6078 | | | miR-30d-3p | | miR-3622b-5p | miR-6731-3p | | | miR-4728-3p | | |
| miR-6081 | | | miR-3116 | | miR-363-5p | miR-6731-5p | | | miR-4728-5p | | |
| miR-6084 | | | miR-3117-3p | | miR-3648 | miR-6732-5p | | | miR-4730 | | |
| miR-6085 | | | miR-3120-5p | | miR-3649 | miR-6733-3p | | | miR-4731-5p | | |
| miR-6086 | | | miR-3121-3p | | miR-3650 | miR-6734-3p | | | miR-4732-3p | | |
| miR-6087 | | | miR-3121-5p | | miR-3651 | miR-6734-5p | | | miR-4732-5p | | |
| miR-6088 | | | miR-3122 | | miR-3652 | miR-6735-3p | | | miR-4734 | | |
| miR-6089 | | | miR-3124-3p | | miR-3653-5p | miR-6735-5p | | | miR-4736 | | |
| miR-608 E | | | miR-3124-5p | | miR-3655 | miR-6736-5p | | | miR-4737 | | |
| miR-6090 | | | miR-3127-3p | | miR-3656 | miR-6737-3p | | | miR-4738-5p | | |
| miR-609 E | | | miR-3127-5p | | miR-3657 | miR-6737-5p | | | miR-4739 | | |
| miR-611 E | | | miR-3128 | | miR-365a-5p | miR-6738-3p | | | miR-4740-3p | | |
| miR-6126 | | | miR-3129-5p | | miR-365b-5p | miR-6738-5p | | | miR-4740-5p | | |
| miR-6127 | | | miR-3130-3p | | miR-3661 | miR-6740-3p | | | miR-4741 | | |
| miR-6129 | | | miR-3131 | | miR-3663-5p | miR-6740-5p | | | miR-4742-3p | | |
| miR-612 E | | | miR-3132 | | miR-3665 | miR-6741-5p | | | miR-4743-3p | | |
| miR-6130 | | | miR-3135a | | miR-3675-3p | miR-6742-3p | | | miR-4743-5p | | |
| miR-6131 | | | miR-3135b | | miR-3677-3p | miR-6742-5p | | | miR-4745-3p | | |
| miR-6132 | | | miR-3136-5p | | miR-3677-5p | miR-6743-3p | | | miR-4745-5p | | |
| miR-6133 | | | miR-3137 | | miR-3678-3p | miR-6743-5p | | | miR-4746-3p | | |
| miR-6134 | | | miR-3138 | | miR-3679-5p | miR-6744-3p | | | miR-4746-5p | | |
| miR-615-3p | | | miR-3139 | | miR-3680-3p | miR-6744-5p | | | miR-4747-3p | | |
| miR-615-5p | | | miR-3140-3p | | miR-3682-3p | miR-6745 | | | miR-4747-5p | | |
| miR-6165 | | | miR-3141 | | miR-3682-5p | miR-6746-5p | | | miR-4748 | | |
| miR-616-3p | | | miR-3144-3p | | miR-3683 | miR-6747-3p | | | miR-4749-5p | | |
| miR-619-3p | | | miR-3146 | | miR-3685 | miR-6747-5p | | | miR-4750-3p | | |
| miR-619-5p | | | miR-3147 | | miR-3687 | miR-6748-3p | | | miR-4750-5p | | |
| miR-622 E | | | miR-675-5p | | miR-3689a-3p | miR-6748-5p | | | miR-4751 | | |
| miR-623 E | | | miR-6760-3p | | miR-3689b-3p | miR-6749-3p | | | miR-4753-3p | | |
| miR-624-3p | | | miR-6760-5p | | miR-3689c | miR-6749-5p | | | miR-4753-5p | | |
| miR-625-5p | | | miR-6761-3p | | miR-3689d | miR-6750-5p | | | miR-4754 | | |
| miR-626 E | | | miR-6761-5p | | miR-3689f | miR-6751-5p | | | miR-4755-3p | | |
| miR-627-3p | | | miR-6762-3p | | miR-3691-3p | miR-6752-3p | | | miR-4755-5p | | |
| miR-627-5p | | | miR-6762-5p | | miR-3691-5p | miR-6752-5p | | | miR-4756-3p | | |
| miR-629-3p | | | miR-6763-3p | | miR-3692-5p | miR-6753-3p | | | miR-4756-5p | | |
| miR-629-5p | | | miR-6763-5p | | miR-370-3p | miR-6753-5p | | | miR-4757-3p | | |
| miR-630 E | | | miR-6764-3p | | miR-3713 | miR-6754-5p | | | miR-4757-5p | | |
| miR-632 E | | | miR-6764-5p | | miR-372-3p | miR-6755-3p | | | miR-4758-3p | | |
| miR-636 E | | | miR-6765-3p | | miR-373-3p | miR-6755-5p | | | miR-4758-5p | | |
| miR-637E | | | miR-6765-5p | | miR-374b-3p | miR-6756-3p | | | miR-4761-3p | | |
| miR-638 E | | | miR-6766-3p | | miR-375 E | miR-6756-5p | | | miR-4761-5p | | |
| miR-639 E | | | miR-6766-5p | | miR-376a-2-5 | miR-6757-5p | | | miR-4763-3p | | |
| miR-643 E | | | miR-6767-3p | | miR-376a-5p | miR-6758-3p | | | miR-4763-5p | | |
| miR-645 E | | | miR-6767-5p | | miR-376c-3p | miR-6758-5p | | | miR-4764-5p | | |
| miR-647 E | | | miR-6768-3p | | miR-377-3p | miR-6759-5p | | | miR-4765 | | |
| miR-648 E | | | miR-6768-5p | | miR-377-5p | miR-675-3p | | | miR-4767 | | |
| miR-6499-3p | | | miR-6769a-5p | | miR-378a-5p | miR-6863 | | | miR-4768-5p | | |
| miR-6499-5p | | | miR-6769b-3p | | miR-378b | miR-6864-5p | | | miR-4769-3p | | |
| miR-6500-3p | | | miR-6769b-5p | | miR-378e | miR-6865-5p | | | miR-4769-5p | | |
| miR-6805-3p | | | miR-676-3p | | miR-378g | miR-6866-5p | | | miR-4772-5p | | |
| miR-6805-5p | | | miR-6770-3p | | miR-381-5p | miR-6867-3p | | | miR-4774-3p | | |
| miR-6806-3p | | | miR-6770-5p | | miR-382-5p | miR-6867-5p | | | miR-4774-5p | | |
| miR-6806-5p | | | miR-6771-5p | | miR-384 E | miR-6868-3p | | | miR-4776-3p | | |
| miR-6807-3p | | | miR-6772-3p | | miR-3907 | miR-6869-5p | | | miR-4776-5p | | |
| miR-6807-5p | | | miR-6772-5p | | miR-3909 | miR-6870-5p | | | miR-4778-3p | | |
| miR-6808-3p | | | miR-6773-3p | | miR-3911 | miR-6871-5p | | | miR-4783-3p | | |
| miR-6808-5p | | | miR-6773-5p | | miR-3912-5p | miR-6872-3p | | | miR-4783-5p | | |
| miR-6809-3p | | | miR-6774-3p | | miR-3913-5p | miR-6873-3p | | | miR-4784 | | |
| miR-6809-5p | | | miR-6774-5p | | miR-3917 | miR-6874-3p | | | miR-4785 | | |
| miR-6810-3p | | | miR-6775-3p | | miR-3921 | miR-6874-5p | | | miR-4787-3p | | |
| miR-6810-5p | | | miR-6775-5p | | miR-3922-3p | miR-6875-3p | | | miR-4787-5p | | |
| miR-6811-3p | | | miR-6776-5p | | miR-3922-5p | miR-6875-5p | | | miR-4792 | | |
| miR-6811-5p | | | miR-6777-3p | | miR-3927-3p | miR-6876-3p | | | miR-4793-3p | | |
| miR-6812-5p | | | miR-6777-5p | | miR-3928-5p | miR-6876-5p | | | miR-4793-5p | | |
| miR-6813-5p | | | miR-6778-3p | | miR-3929 | miR-6877-3p | | | miR-4794 | | |
| miR-6814-3p | | | miR-6778-5p | | miR-3934-3p | miR-6877-5p | | | miR-4798-5p | | |
| miR-6814-5p | | | miR-6779-5p | | miR-3937 | miR-6878-3p | | | miR-4800-5p | | |
| miR-6815-3p | | | miR-6780a-3p | | miR-3940-5p | miR-6878-5p | | | miR-4804-5p | | |
| miR-6815-5p | | | miR-6780a-5p | | miR-3944-3p | miR-6879-3p | | | miR-483-5p | | |
| miR-6816-5p | | | miR-6780b-3p | | miR-3944-5p | miR-6879-5p | | | miR-484 E | | |
| miR-6817-3p | | | miR-6781-5p | | miR-3945 | miR-6880-5p | | | miR-485-3p | | |
| miR-6817-5p | | | miR-6782-5p | | miR-3960 | miR-6881-3p | | | miR-485-5p | | |
| miR-6818-3p | | | miR-6783-3p | | miR-3972 | miR-6881-5p | | | miR-486-3p | | |
| miR-6818-5p | | | miR-6783-5p | | miR-3974 | miR-6882-3p | | | miR-486-5p | | |
| miR-6819-3p | | | miR-6784-5p | | miR-3975 | miR-6883-3p | | | miR-487a-5p | | |
| miR-6819-5p | | | miR-6785-5p | | miR-3978 | miR-6883-5p | | | miR-489-5p | | |
| miR-6820-5p | | | miR-6786-3p | | miR-409-3p | miR-6884-5p | | | miR-490-5p | | |
| miR-6821-3p | | | miR-6786-5p | | miR-409-5p | miR-6885-3p | | | miR-491-5p | | |
| miR-6821-5p | | | miR-6787-5p | | miR-410-5p | miR-6885-5p | | | miR-492 E | | |
| miR-6822-3p | | | miR-6788-3p | | miR-412-3p | miR-6886-5p | | | miR-493-3p | | |
| miR-6822-5p | | | miR-6788-5p | | miR-422a | miR-6887-5p | | | miR-493-5p | | |
| miR-6823-5p | | | miR-6789-3p | | miR-423-3p | miR-6888-3p | | | miR-494-5p | | |
| miR-6824-3p | | | miR-6789-5p | | miR-423-5p | miR-6888-5p | | | miR-496E | | |
| miR-6824-5p | | | miR-6790-5p | | miR-4252 | miR-6889-5p | | | miR-497-5p | | |
| miR-6825-3p | | | miR-6791-3p | | miR-4253 | miR-6890-3p | | | miR-4999-5p | | |
| miR-6825-5p | | | miR-6791-5p | | miR-4254 | miR-6890-5p | | | miR-5000-3p | | |
| miR-6827-3p | | | miR-6792-3p | | miR-4255 | miR-6891-5p | | | miR-5000-5p | | |
| miR-6827-5p | | | miR-6793-5p | | miR-4256 | miR-6892-3p | | | miR-5001-3p | | |
| miR-6828-3p | | | miR-6794-3p | | miR-4257 | miR-6893-5p | | | miR-5001-5p | | |
| miR-6829-3p | | | miR-6794-5p | | miR-4258 | miR-6894-3p | | | miR-5002-3p | | |
| miR-6829-5p | | | miR-6795-5p | | miR-4259 | miR-6894-5p | | | miR-5003-3p | | |
| miR-6830-3p | | | miR-6796-5p | | miR-425-3p | miR-6895-3p | | | miR-5004-3p | | |
| miR-6831-5p | | | miR-6797-5p | | miR-4260 | miR-708-5p | | | miR-5004-5p | | |
| miR-6832-5p | | | miR-6798-3p | | miR-4265 | miR-7106-5p | | | miR-5006-3p | | |
| miR-6833-3p | | | miR-6798-5p | | miR-4267 | miR-7107-3p | | | miR-5006-5p | | |
| miR-6833-5p | | | miR-6799-3p | | miR-4268 | miR-7107-5p | | | miR-5007-5p | | |
| miR-6834-5p | | | miR-6799-5p | | miR-4271 | miR-7108-5p | | | miR-5008-3p | | |
| miR-6835-5p | | | miR-6800-5p | | miR-4273 | miR-7109-5p | | | miR-5008-5p | | |
| miR-6836-3p | | | miR-6801-3p | | miR-4277 | miR-7110-3p | | | miR-5009-5p | | |
| miR-6836-5p | | | miR-6801-5p | | miR-4278 | miR-7110-5p | | | miR-500a-3p | | |
| miR-6837-3p | | | miR-6802-5p | | miR-4279 | miR-7111-5p | | | miR-5010-3p | | |
| miR-6837-5p | | | miR-6803-3p | | miR-4280 | miR-7112-3p | | | miR-5010-5p | | |
| miR-6838-3p | | | miR-6803-5p | | miR-4281 | miR-7112-5p | | | miR-5011-3p | | |
| miR-6840-3p | | | miR-6804-3p | | miR-4283 | miR-7113-3p | | | miR-501-5p | | |
| miR-6840-5p | | | miR-6804-5p | | miR-4285 | miR-7113-5p | | | miR-502-5p | | |
| miR-6841-3p | | | miR-8089 | | miR-4287 | miR-7114-5p | | | miR-503-3p | | |
| miR-6842-3p | | | miR-873-3p | | miR-4289 | miR-711 E | | | miR-5047 | | |
| miR-6842-5p | | | miR-873-5p | | miR-4290 | miR-7150 | | | miR-504-3p | | |
| miR-6843-3p | | | miR-874-5p | | miR-4291 | miR-7151-3p | | | miR-504-5p | | |
| miR-6845-5p | | | miR-875-3p | | miR-4292 | miR-7152-3p | | | miR-505-3p | | |
| miR-6846-3p | | | miR-876-3p | | miR-4293 | miR-7152-5p | | | miR-505-5p | | |
| miR-6846-5p | | | miR-876-5p | | miR-4297 | miR-7154-3p | | | miR-507 E | | |
| miR-6847-3p | | | miR-885-3p | | miR-4298 | miR-7154-5p | | | miR-5087 | | |
| miR-6847-5p | | | miR-885-5p | | miR-4299 | miR-7155-3p | | | miR-5088-3p | | |
| miR-6848-3p | | | miR-887-5p | | miR-4301 | miR-7155-5p | | | miR-5088-5p | | |
| miR-6848-5p | | | miR-889-5p | | miR-4302 | miR-7156-3p | | | miR-5089-3p | | |
| miR-6849-5p | | | miR-891a-3p | | miR-4304 | miR-7157-3p | | | miR-5089-5p | | |
| miR-6850-3p | | | miR-892c-3p | | miR-4306 | miR-7157-5p | | | miR-508-5p | | |
| miR-6850-5p | | | miR-920 E | | miR-4308 | miR-7160-3p | | | miR-5090 | | |
| miR-6851-5p | | | miR-921 E | | miR-4312 | miR-7160-5p | | | miR-5095 | | |
| miR-6852-3p | | | miR-922 E | | miR-4314 | miR-7161-3p | | | miR-5096 | | |
| miR-6852-5p | | | miR-92a-1-5p | | miR-4315 | miR-7161-5p | | | miR-509-3p | | |
| miR-6853-3p | | | miR-92a-2-5p | | miR-4316 | miR-7162-3p | | | miR-509-5p | | |
| miR-6853-5p | | | miR-92b-5p | | miR-4318 | miR-7162-5p | | | miR-5100 | | |
| miR-6854-3p | | | miR-933 E | | miR-431-3p | miR-718 E | | | miR-511-5p | | |
| miR-6855-5p | | | miR-937-5p | | miR-431-5p | miR-744-3p | | | miR-512-3p | | |
| miR-6856-5p | | | miR-939-3p | | miR-4320 | miR-744-5p | | | miR-514b-5p | | |
| miR-6857-5p | | | miR-939-5p | | miR-4322 | miR-7515 | | | miR-515-3p | | |
| miR-6858-5p | | | miR-93-3p | | miR-4324 | miR-758-3p | | | miR-515-5p | | |
| miR-6859-3p | | | miR-942-5p | | miR-4325 | miR-758-5p | | | miR-516a-3p | | |
| miR-6859-5p | | | miR-9500 | | miR-4326 | miR-760 E | | | miR-516a-5p | | |
| miR-6860 | | | miR-96-5p | | miR-4327 | miR-761 E | | | miR-516b-3p | | |
| miR-6861-3p | | | miR-98-5p | | miR-432-3p | miR-762 E | | | miR-516b-5p | | |
| miR-6861-5p | | | miR-99b-3p | | miR-432-5p | miR-764 E | | | miR-517-5p | | |
| miR-6862-3p | | | miR-9-5p | | miR-433-3p | miR-765 E | | | miR-517a-3p | | |
| miR-6862-5p | | | miR-708-3p | | miR-4417 | miR-766-5p | | | miR-517b-3p | | |
| miR-24-2-5p | | | miR-297 | | miR-4418 | miR-767-3p | | | miR-517c-3p | | |
| miR-15b-5p | | | miR-206 | | miR-4419a | miR-767-5p | | | miR-5187-5p | | |
| miR-548n | | | miR-138-5p | | miR-4419b | miR-769-3p | | | miR-5189-5p | | |
| miR-542-3p | | | miR-143-3p | | miR-4420 | miR-7703 | | | miR-518c-5p | | |
| miR-301a-5p | | | miR-146a-5p | | miR-4421 | miR-7704 | | | miR-518d-5p | | |
| miR-1260a | | | miR-129-2-3p | | miR-4423-5p | miR-7706 | | | miR-518e-5p | | |
| miR-503-5p | | | miR-10b-3p | | miR-4424 | miR-770-5p | | | miR-518f-5p | | |
| miR-1260b | | | miR-450a-1-3p | | miR-4425 | miR-7843-5p | | | miR-5190 | | |
| miR-346 | | | miR-605-5p | | miR-4430 | miR-7845-5p | | | miR-5191 | | |
| miR-125b-2-3p | | | let-7c-3p | | miR-4432 | miR-7846-3p | | | miR-5192 | | |
| miR-548ab | | | miR-877-3p | | miR-4433a-3p | miR-7847-3p | | | miR-5194 | | |
| miR-141-3p | | | miR-107 | | miR-4433b-3p | miR-7849-3p | | | miR-5195-5p | | |
| miR-1306-5p | | | miR-130a-3p | | miR-4433b-5p | miR-7850-5p | | | miR-5196-3p | | |
| miR-378d | | | miR-514a-3p | | miR-4435 | miR-7851-3p | | | miR-5196-5p | | |
| miR-4483 | | | miR-424-5p | | miR-4436a | miR-7854-3p | | | miR-519a-5p | | |
| miR-4485-5p | | | miR-146b-5p | | miR-4436b-3p | miR-7856-5p | | | miR-519b-5p | | |
| miR-4486 | | | miR-940 | | miR-4436b-5p | miR-7974 | | | miR-519c-5p | | |
| miR-4487 | | | miR-9-3p | | miR-4437 | miR-7975 | | | miR-519d-5p | | |
| miR-4488 | | | miR-548u | | miR-4439 | miR-7976 | | | miR-519e-5p | | |
| miR-4489 | | | miR-548z | | miR-4440 | miR-7978 | | | miR-520a-5p | | |
| miR-448 E | | | miR-550a-3-5 | | miR-4441 | miR-7-5p | | | miR-520c-5p | | |
| miR-4490 | | | miR-550a-3p | | miR-4442 | miR-8052 | | | miR-520g-5p | | |
| miR-4492 | | | miR-550a-5p | | miR-4443 | miR-8056 | | | miR-522-5p | | |
| miR-4494 | | | miR-550b-2-5 | | miR-4445-5p | miR-8057 | | | miR-523-5p | | |
| miR-4496 | | | miR-552-3p | | miR-4446-3p | miR-8058 | | | miR-525-5p | | |
| miR-4497 | | | miR-554 E | | miR-4447 | miR-8059 | | | miR-526a | | |
| miR-4498 | | | miR-555 E | | miR-4448 | miR-8060 | | | miR-526b-5p | | |
| miR-449a | | | miR-5571-3p | | miR-4449 | miR-8062 | | | miR-532-5p | | |
| miR-449b-5p | | | miR-5571-5p | | miR-4450 | miR-8064 | | | miR-541-3p | | |
| miR-4467 | | | miR-5572 | | miR-4451 | miR-8065 | | | miR-542-5p | | |
| miR-4468 | | | miR-557 E | | miR-4452 | miR-8068 | | | miR-544a | | |
| miR-4469 | | | miR-5580-5p | | miR-4453 | miR-8069 | | | miR-544b | | |
| miR-4470 | | | miR-5581-3p | | miR-4455 | miR-8071 | | | miR-548ai | | |
| miR-4471 | | | miR-5584-3p | | miR-4456 | miR-8072 | | | miR-548an | | |
| miR-4472 | | | miR-5584-5p | | miR-4458 | miR-8073 | | | miR-548ao-3p | | |
| miR-4474-3p | | | miR-5585-3p | | miR-4459 | miR-8074 | | | miR-548aq-5p | | |
| miR-4476 | | | miR-5586-3p | | miR-4461 | miR-8075 | | | miR-548ar-5p | | |
| miR-4478 | | | miR-5587-3p | | miR-4462 | miR-8077 | | | miR-548au-3p | | |
| miR-4479 | | | miR-5587-5p | | miR-4464 | miR-8078 | | | miR-548ax | | |
| miR-4481 | | | miR-5589-3p | | miR-4465 | miR-8080 | | | miR-548bb-3p | | |
| miR-4482-3p | | | miR-5589-5p | | miR-4466 | miR-8081 | | | miR-548d-3p | | |
| miR-4482-5p | | | miR-8086 | | miR-548s | miR-8083 | | | miR-548h-3p | | |
| miR-8085 | | | miR-548q | |  |  | | |  | | |
| **HMUCC** | | | | | | | | | | | |
| miR-708-3p | | | miR-6877-5p | | miR-195-5p | miR-103a-3p | | | miR-27a-5p | | |
| miR-516b-5p | | | miR-10b-3p | | miR-107 | miR-30d-3p | | | miR-378g | | |
| miR-455-5p | | | miR-450a-1-3p | | miR-130a-3p | miR-125b-1-3p | | | miR-6501-5p | | |
| miR-455-3p | | | hsa-let-7g-3p | | miR-514a-3p | miR-212-5p | | | miR-346 | | |
| miR-409-3p | | | miR-26a-2-3p | | miR-4449 | miR-550a-3p | | | miR-125b-2-3p | | |
| miR-34c-5p | | | miR-29a-5p | | miR-424-5p | miR-15b-5p | | | miR-196a-5p | | |
| miR-34c-3p | | | miR-6842-3p | | miR-99b-5p | miR-31-5p | | | miR-30b-3p | | |
| miR-34b-3p | | | miR-6087 | | hsa-let-7e-3p | miR-548n | | | miR-1246 | | |
| miR-297 | | | miR-10b-5p | | miR-653-5p | miR-125b-5p | | | miR-203a-3p | | |
| miR-214-5p | | | miR-345-3p | | miR-212-3p | miR-99a-5p | | | miR-6720-5p | | |
| miR-214-3p | | | hsa-let-7c-3p | | miR-16-5p | miR-3909 | | | miR-548ab | | |
| miR-206 | | | miR-6500-3p | | miR-522-3p | miR-34a-5p | | | miR-449c-5p | | |
| miR-145-5p | | | miR-3648 | | miR-146b-5p | hsa-let-7a-2-3p | | | miR-141-3p | | |
| miR-145-3p | | | hsa-let-7c-5p | | miR-99b-3p | miR-615-5p | | | miR-135b-5p | | |
| miR-143-5p | | | miR-33a-5p | | miR-6510-3p | miR-542-3p | | | miR-140-3p | | |
| miR-138-5p | | | miR-4510 | | miR-4440 | miR-196b-5p | | | miR-22-5p | | |
| miR-143-3p | | | miR-9-5p | | miR-3180-3p | miR-652-3p | | | miR-6720-3p | | |
| miR-199a-3p | | | miR-222-5p | | miR-3180 | hsa-let-7e-5p | | | miR-132-3p | | |
| miR-199b-3p | | | miR-877-3p | | miR-2682-5p | miR-132-5p | | | miR-342-5p | | |
| miR-199a-5p | | | miR-653-3p | | miR-940 | miR-3614-5p | | | miR-1306-5p | | |
| miR-146a-5p | | | miR-3607-3p | | miR-9-3p | miR-301a-5p | | | miR-125a-5p | | |
| miR-16-1-3p | | | miR-31-3p | | miR-627-3p | miR-24-1-5p | | | miR-183-3p | | |
| miR-199b-5p | | | miR-184 | | miR-605-5p | miR-1260a | | | miR-324-3p | | |
| miR-129-5p | | | miR-328-3p | | miR-5009-5p | miR-5100 | | | miR-625-3p | | |
| miR-155-5p | | | miR-15a-5p | | miR-378e | miR-503-5p | | | miR-615-3p | | |
| miR-129-2-3p | | | miR-182-3p | | miR-149-5p | miR-1306-3p | | | miR-378d | | |
| miR-181a-3p | | | miR-125a-3p | | miR-24-2-5p | miR-1260b | | | miR-26b-5p | | |
| miR-147b | | | miR-101-3p | |  |  | | |  | | |
| **Overlapped miRNA** | | | | | | | | | | | |
| miR-708-5p | | | miR-129-2-3p | | miR-125a-3p | miR-103a-3p | | | miR-27a-5p | | |
| miR-708-3p | | | miR-10b-3p | | miR-195-5p | miR-30d-3p | | | miR-378g | | |
| miR-455-5p | | | miR-450a-1-3p | | miR-107 | miR-550a-3p | | | miR-6501-5p | | |
| miR-409-3p | | | hsa-let-7g-3p | | miR-130a-3p | miR-15b-5p | | | miR-346 | | |
| miR-297 | | | miR-29a-5p | | miR-514a-3p | miR-548n | | | miR-125b-2-3p | | |
| miR-206 | | | miR-6842-3p | | miR-424-5p | hsa-let-7a-2-3p | | | miR-196a-5p | | |
| miR-145-3p | | | hsa-let-7c-3p | | miR-16-5p | miR-615-5p | | | miR-6720-5p | | |
| miR-143-5p | | | miR-33a-5p | | miR-146b-5p | miR-542-3p | | | miR-548ab | | |
| miR-138-5p | | | miR-4510 | | miR-940 | miR-196b-5p | | | miR-141-3p | | |
| miR-143-3p | | | miR-9-5p | | miR-9-3p | miR-301a-5p | | | miR-342-5p | | |
| miR-199a-3p | | | miR-877-3p | | miR-627-3p | miR-24-1-5p | | | miR-1306-5p | | |
| miR-199b-3p | | | miR-653-3p | | miR-605-5p | miR-1260a | | | miR-183-3p | | |
| miR-146a-5p | | | miR-31-3p | | miR-5009-5p | miR-5100 | | | miR-324-3p | | |
| miR-129-5p | | | miR-15a-5p | | miR-378e | miR-503-5p | | | miR-378d | | |
| miR-155-5p | | | miR-182-3p | | miR-24-2-5p | miR-1260b | | |  | | |
